# Supplementary material
Source: PubMed Central journal article supplement (PMC5377492)
Supplement: AEM.03326-16_zam999117775s1.pdf [file AEM.03326-16_zam999117775s1.pdf]

## Supplemental Material

### AEM03326-16

#### Insight into the Carbon-Source Dependent Inducible Veratrylalcohol and Ferulic acid Metabolism in *Pseudomonas putida* CSV86

Karishma Mohan and Prashant S. Phale✉

Department of Biosciences and Bioengineering, Indian Institute of Technology-Bombay, Powai,  
Mumbai, 400 076, India.

---

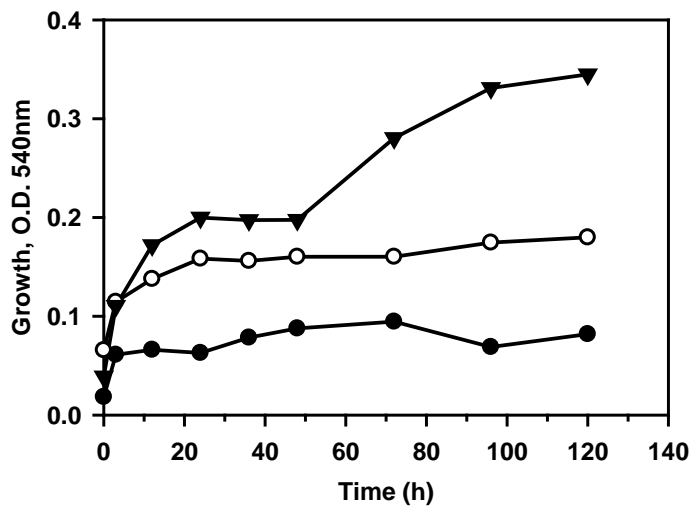

**Fig S1** Growth profile of *P. putida* CSV86 on different concentration of lignin as a sole carbon sources. The concentration of Lignin sulphonate used was: 0.05% (●), 0.1% (○), and 0.2% (▼). Culture grown on 0.1% naphthalene was used as an inoculum.

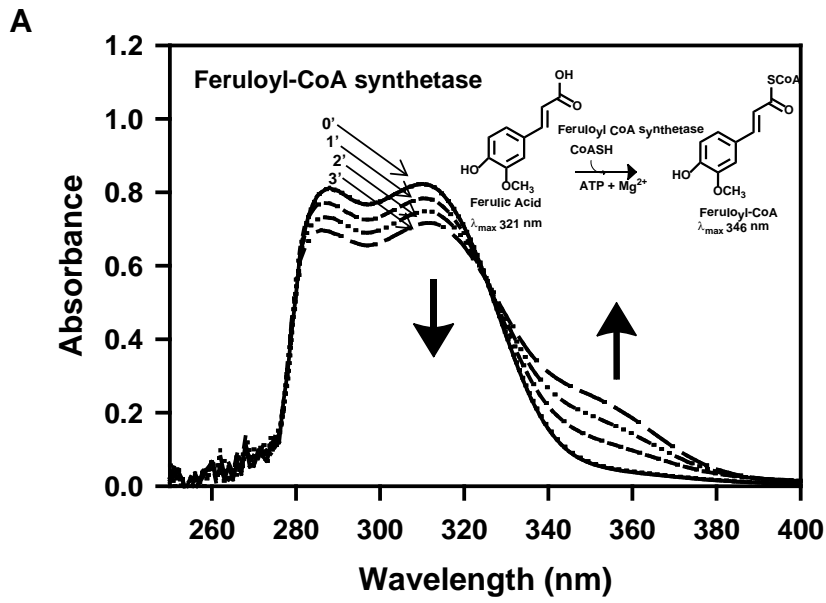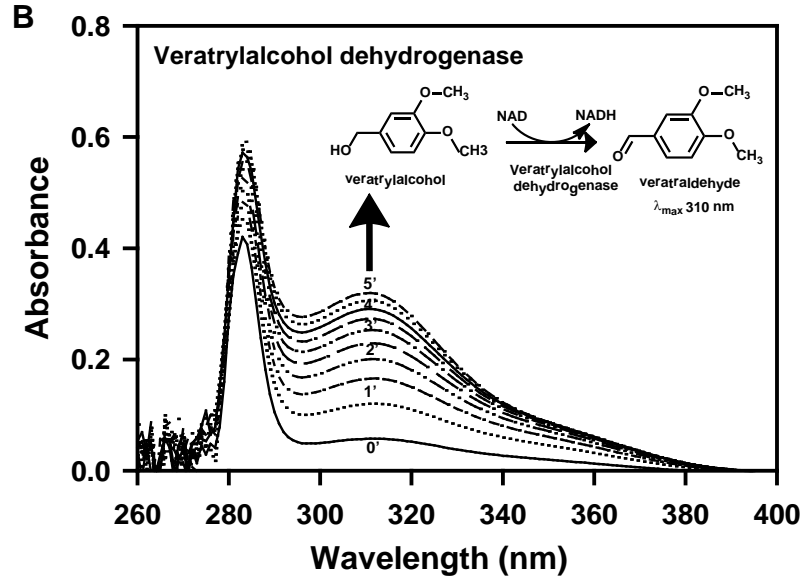

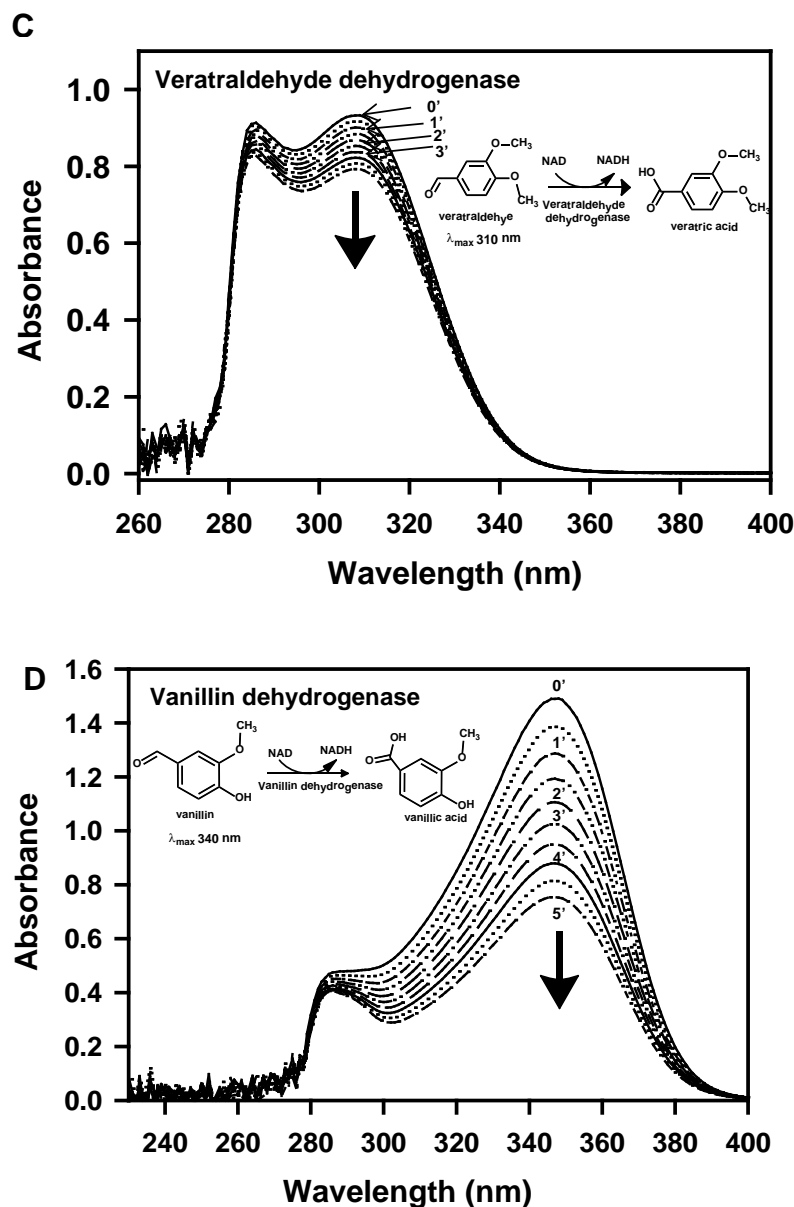

**Fig S2** Time-dependent spectral scan of various enzyme reactions in the cell-free extract of *P. putida* CSV86. Enzyme reactions were scanned from 200 to 400 nm with 30 seconds or one minute interval for: (A) Feruloyl-CoA synthetase (using cells grown on ferulic acid, no spectral changes were observed in the absence of either ATP or Co-A), (B) Veratryl alcohol dehydrogenase (using cells grown on veratryl alcohol), (C) Veratraldehyde dehydrogenase (using cells grown on veratryl alcohol), and (D) Vanillin dehydrogenase (using cells grown on ferulic acid). Arrows indicate the appearance of product (up arrow) and disappearance of the substrate (down arrow), respectively. The reactions are depicted in inset. See materials and method for assay details.

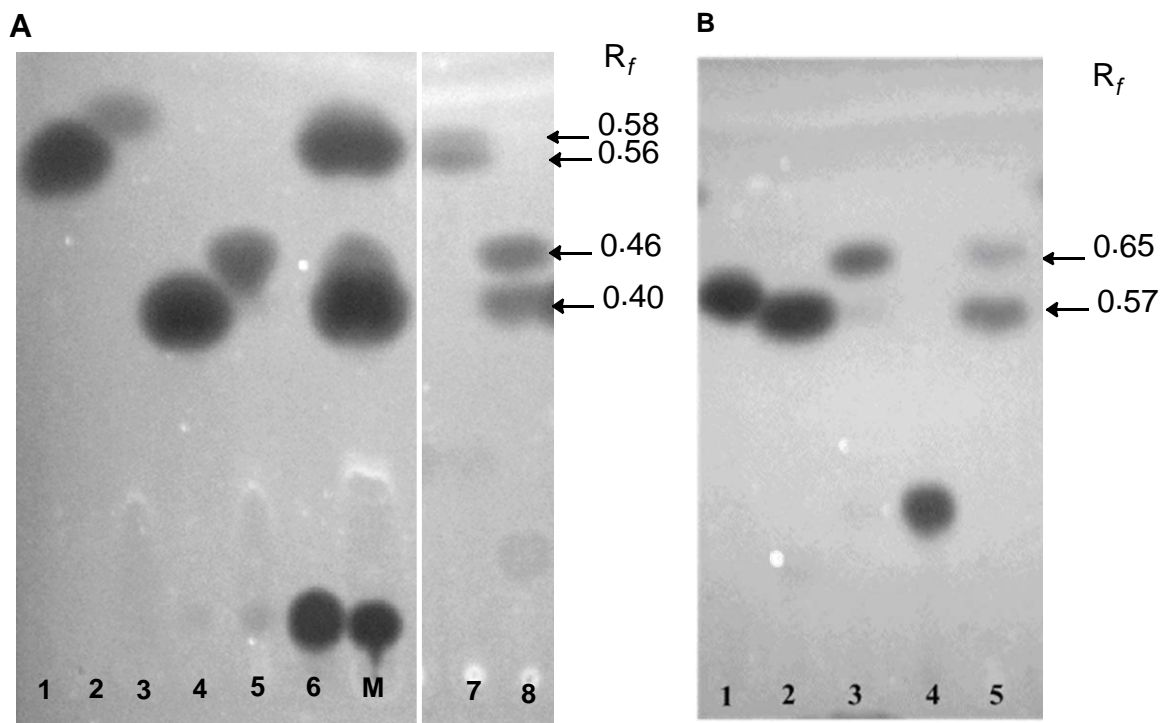

**Fig S3** TLC analysis of of bulk enzyme reaction of VDH, ValDDH and FCS from the CFE of *P. putida* CSV86. (A) The authentic compounds and enzyme reaction products were separated using solvent system A [Hexane: Chloroform: Acetic acid, 8:2:2 (v/v)],  $R_f$  values are: Lane 1, veratraldehyde (0.55); 2, veratric acid (0.59); 3, vanillin (0.4); 4, vanillic acid (0.44); 5, protocatechuic acid (0.06); 7, extract of enzyme reaction for ValDDH from cell grown on veratraldehyde; 8, extract of enzyme reaction for VDH from cells grown on vanillin. Lane M is a mixture of all authentic compounds. (B) The solvent system B [Hexane: Chloroform: Acetic acid, 7:3:2 (v/v)] was used to separate the authentic compounds and enzyme reaction products, the  $R_f$  values are: lane 1, ferulic acid (0.58); 2, vanillin (0.56); 3, vanillic acid (0.65); 4, protocatechuic acid (0.23); 5, extract of enzyme reaction for FCS from cells grown on ferulic acid.

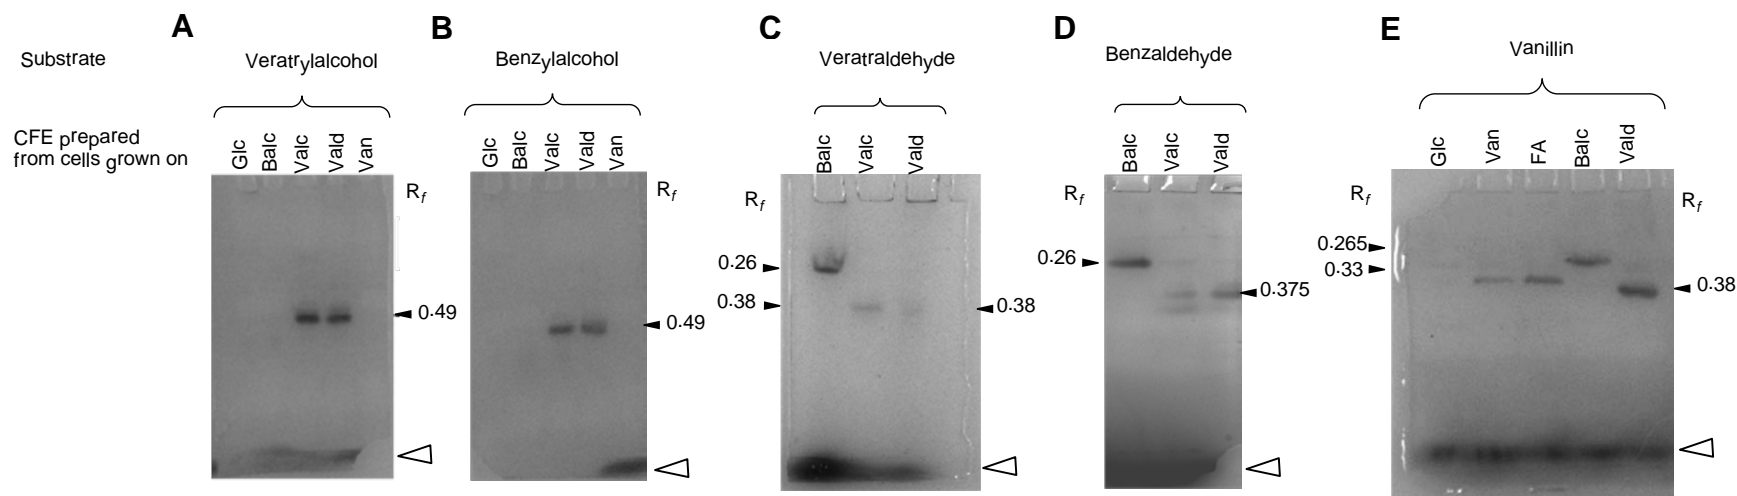

**Fig S4** In-gel activity (zymogram) for various aromatic alcohol- and aldehyde-dehydrogenases from CFE of *P. putida* CSV86 cells grown on different aromatic compounds. Activity staining was performed using  $\text{NAD}^+$  as a co-factor and substrates (100  $\mu\text{M}$ ) like veratrylalcohol (panel A), benzylalcohol (panel B), veratraldehyde (panel C), benzaldehyde (panel D) or vanillin (panel E). Each lane contained equal amount (100  $\mu\text{g}$ ) of total protein from CFE prepared from cells grown on: glucose (Glc), benzylalcohol (Balc), veratrylalcohol (Valc), veratraldehyde (Vald), vanillin (Van) and ferulic acid (FA). Open arrow head indicates the dye front.

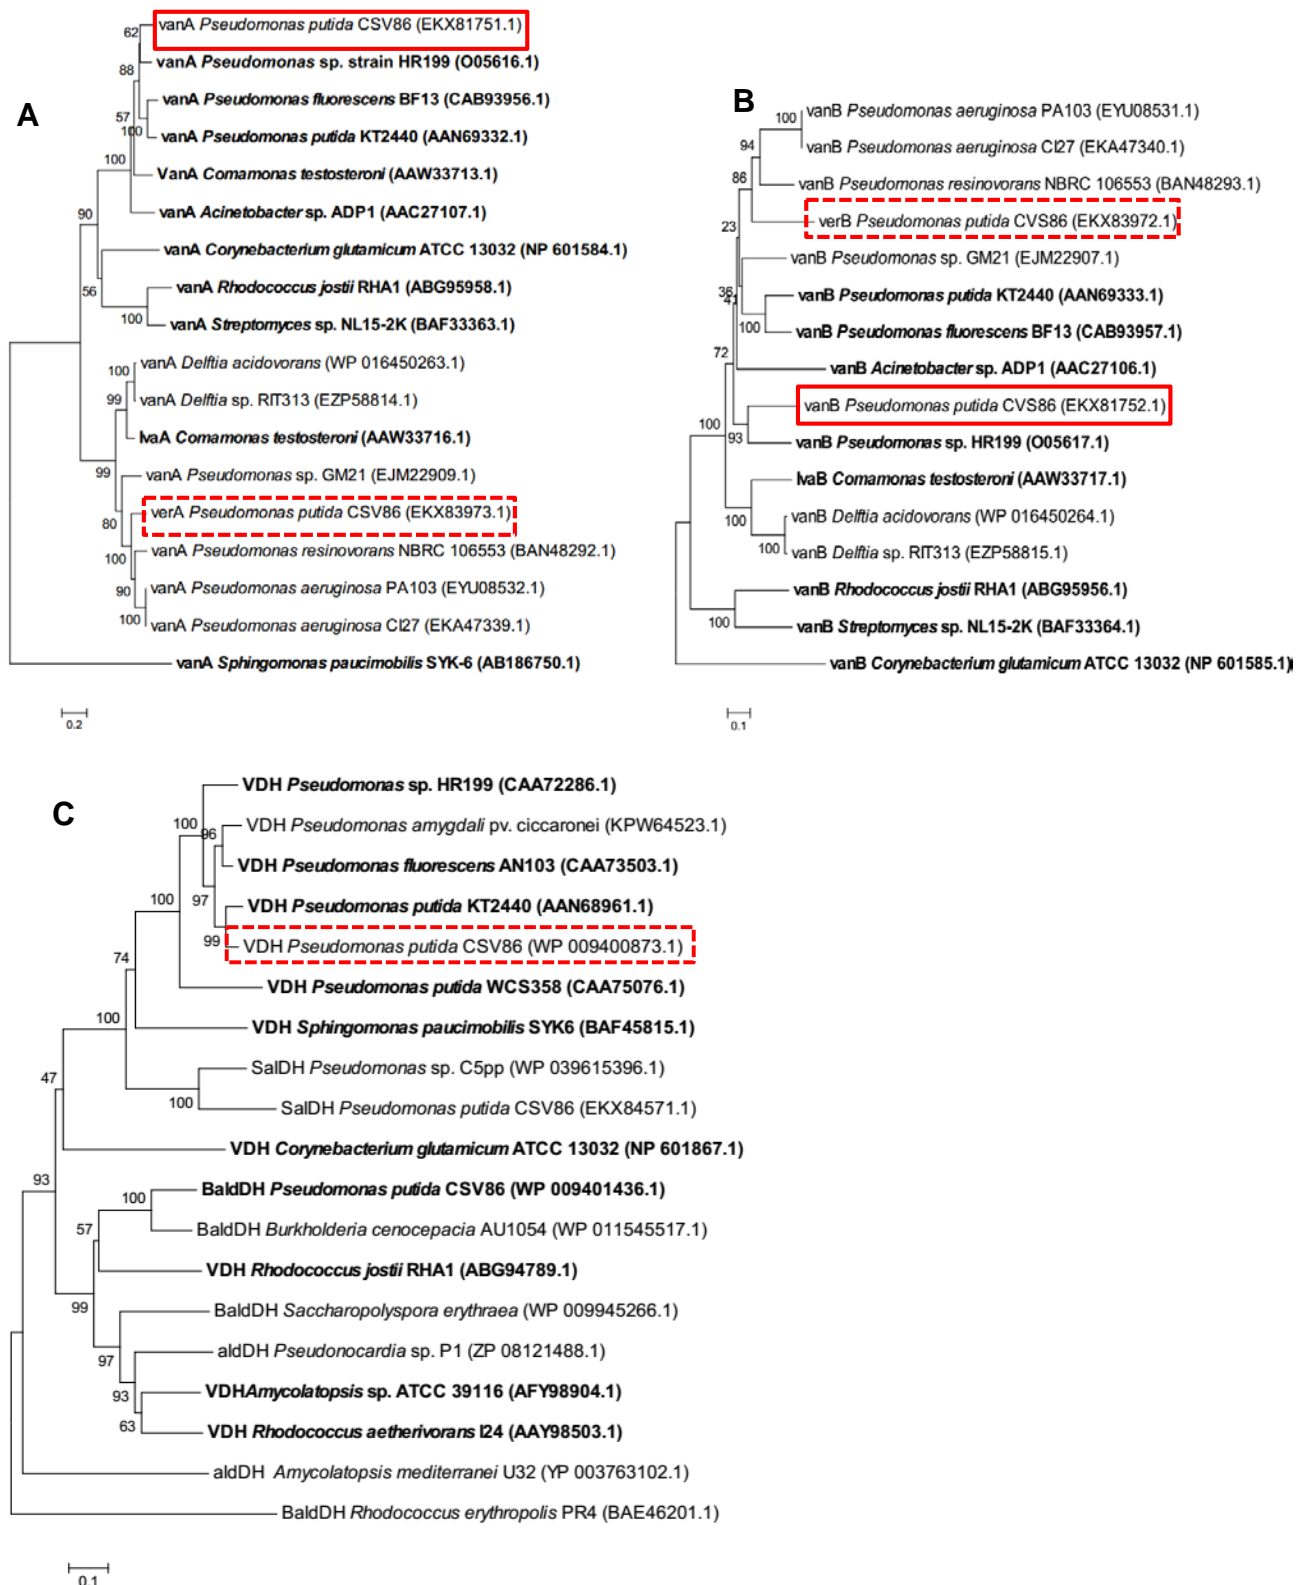

**Fig S5** Rooted phylogenetic neighbor-joining tree for *O*-demethylase oxygenase (A), reductase (B) and vanillin dehydrogenase (C) components identified in *Pseudomonas putida* CSV86.

Multiple-sequence alignment for proteins was performed using ClustalW. The phylogenetic tree was constructed using MEGA 6 (44) with a bootstrap consensus of 500 replicates. Protein accession number (NCBI database) is given in the parenthesis. Enzymes characterized at the functional level are shown in boldface type. Boot strap confidence limits (expressed as percentage) are shown at nodes.

**Table S1** List of primers used in current study.

| Name                                           | Primer                 | Sequence<br>(5'----- 3')                                | Expected<br>amplicon<br>length (bp) |
|------------------------------------------------|------------------------|---------------------------------------------------------|-------------------------------------|
| <b>A] Primers for co-transcription studies</b> |                        |                                                         |                                     |
| i) <i>fer</i> locus                            |                        |                                                         |                                     |
| FO1                                            | FO F1<br>FO R1         | GTCAACGAAAGCGTGCCATT<br>CCAGCTTGACGTTGAATCCG            | 650                                 |
| FO2                                            | FO F2<br>VDH DR        | GACTCCGAGTTCGGCTTGTC<br>AGGGATCCGGCGAAGTCCTGGGACAGCAAGG | 800                                 |
| FO3                                            | FO F3<br>FO R2         | CGAGGATTTCAAGCTTTCGT<br>CCCAGAGAAAATCCCTGAACC           | 900                                 |
| FO4                                            | FA 4 F<br>FO R3        | CGAGGCGCAGGCGGCACAGGTGC<br>CGAGGACCAGATGAAGGATG         | 896                                 |
| ii) <i>ver</i> locus                           |                        |                                                         |                                     |
| VrO1                                           | V10 F1<br>V101 NR      | GCTCTGGACGCGTGATTGAAG<br>TAAGTCGGCGGTTTCATAGG           | 712                                 |
| VrO2                                           | V10 F2<br>V10 R1       | GGGGACGTCTACCACTATGA<br>CCCATGTCAACGTAGCCAT             | 1096                                |
| VrO3                                           | V103 NF<br>V10 R2      | TCGGCATTCCGGGCCTGTACGTCA<br>GCGTACTCACCTGCAATGAC        | 914                                 |
| VrO4                                           | V104F<br>V104R         | GGACTIONACTGATAGGTCTGC<br>AGTTCCGACCGAGAGCTTCG          | 862                                 |
| iii) <i>van</i> locus                          |                        |                                                         |                                     |
| VnO                                            | V20 NF<br>V20 NR       | GCTTCATGGAGAACATCCTGCC<br>TGTCCAGCGCGAACAGGTTGC         | 791                                 |
| <b>B] Primers for q-PCR</b>                    |                        |                                                         |                                     |
| verA                                           | Ver F<br>Ver R         | GTTCAATGGTGCAGGACAGTG<br>AGATACTCGCCGCTACTGTGG          | 186                                 |
| vanA                                           | Van F<br>Van R         | TAACCTGCATTGGGCTGACA<br>ATGTTCTCCATGAAGCGACTG           | 216                                 |
| rpoD                                           | rpoD RT F<br>rpoD RT R | GACAGTGACGACGAAGACGA<br>TCACGACCATGCTTCTTGAG            | 155                                 |



**Table S2** Identification and annotation of Phenylpropanoid metabolic genes in *Pseudomonas putida* CSV86.

| Gene                                                             | Predicted function*                                         | Size (bp) | Protein Homolog <sup>#</sup>                                                                    | Coverage / Identity (%) | E-value       |
|------------------------------------------------------------------|-------------------------------------------------------------|-----------|-------------------------------------------------------------------------------------------------|-------------------------|---------------|
| <b>A] Ferulic acid metabolism (<i>fer</i> locus, contig 115)</b> |                                                             |           |                                                                                                 |                         |               |
| <i>marR</i>                                                      | Transcriptional regulator, MarR family (EKX84209.1)         | 471       | MarR family transcriptional regulator [ <i>Pseudomonas putida</i> ] (WP_064304187.1)            | 100/99                  | 5e-104        |
|                                                                  |                                                             |           | <b>Transcriptional regulator [<i>Pseudomonas fluorescens</i> BF13] (CAD60265.1)</b>             | <b>89/83</b>            | <b>2e-78</b>  |
|                                                                  |                                                             |           | <b>MarR family transcriptional regulator [<i>Sphingobium</i> sp. SYK-6] (BAK67179.1)</b>        | <b>80/34</b>            | <b>5e-19</b>  |
| <i>ech</i>                                                       | <i>p</i> -Hydroxycinnamoyl CoA hydratase/lyase (EKX84210.1) | 831       | <i>p</i> -Hydroxycinnamoyl CoA hydratase/lyase [ <i>Pseudomonas putida</i> ] (WP_046785643.1)   | 100/98                  | 0.0           |
|                                                                  |                                                             |           | <i>p</i> -Hydroxycinnamoyl-CoA hydratase-lyase [ <i>Pseudomonas putida</i> KT2440] (AAN68962.1) | 100/95                  | 0.0           |
|                                                                  |                                                             |           | <b>Enoyl-CoA hydratase [<i>Pseudomonas</i> sp. HR199] (CAA72285.1)</b>                          | <b>88/91</b>            | <b>4e-170</b> |
| <i>vdh</i>                                                       | Vanillin dehydrogenase* (EKX84211.1)                        | 1449      | Salicylaldehyde dehydrogenase [ <i>Pseudomonas putida</i> strain CBF10-2] (OAI86349.1)          | 100/99                  | 0.0           |
|                                                                  |                                                             |           | <b>Vanillin dehydrogenase [<i>Pseudomonas putida</i> KT2440] (AAN68961.1)</b>                   | <b>100/90</b>           | <b>0.0</b>    |
|                                                                  |                                                             |           | <b>Vanillin dehydrogenase [<i>Pseudomonas</i> sp. HR199] (CAA72286.1)</b>                       | <b>100/80</b>           | <b>0.0</b>    |

|                                                                          |                                                       |      |                                                                                           |              |              |
|--------------------------------------------------------------------------|-------------------------------------------------------|------|-------------------------------------------------------------------------------------------|--------------|--------------|
| <i>fcs</i>                                                               | Feruloyl-CoA synthase* (EKX84212.1)                   | 1884 | Feruloyl-CoA synthase [ <i>Pseudomonas putida</i> strain CBF10-2] (OAI86350.1)            | 100/99       | 0.0          |
|                                                                          |                                                       |      | <b>Feruloyl-CoA synthetase [<i>Pseudomonas</i> sp. HR199] (CAB60226.1)</b>                | <b>93/76</b> | <b>0.0</b>   |
|                                                                          |                                                       |      | <b>Feruloyl-CoA synthetase [<i>Rhodococcus aetherivorans</i> I24] (AA Y98502.1)</b>       | <b>67/21</b> | <b>7e-12</b> |
| <i>kct</i>                                                               | Acetyl-CoA acetyltransferase (EKX84213.1)             | 1233 | Acetyl-CoA acetyltransferase [ <i>Pseudomonas putida</i> CBF10-2] (OAI86351.1)            | 100/97       | 0.0          |
|                                                                          |                                                       |      | Acetyl-CoA acetyltransferase [ <i>Pseudomonas putida</i> SQ1](KHL76142.1)                 | 99/85        | 0.0          |
|                                                                          |                                                       |      | Acetyl-CoA acetyltransferase [ <i>Pseudomonas putida</i> ] (WP_046785641.1)               | 99/85        | 0.0          |
| <i>acdH</i>                                                              | Acyl-CoA dehydrogenase domain-containing (EKX84214.1) | 1734 | Acyl-CoA dehydrogenase [ <i>Pseudomonas putida</i> CBF10-2](OAI86352.1)                   | 100/98       | 0.0          |
|                                                                          |                                                       |      | Acyl-CoA dehydrogenase [ <i>Pseudomonas</i> sp. NBRC 111134] (WP_060517258.1)             | 99/78        | 0.0          |
|                                                                          |                                                       |      | Acyl-CoA dehydrogenase [ <i>Pseudomonas putida</i> SQ1] (KHL76143.1)                      | 100/76       | 0.0          |
| <b>B] <u>Veratric acid metabolism (<i>ver</i> locus, contig 119)</u></b> |                                                       |      |                                                                                           |              |              |
| <i>marR</i>                                                              | Transcriptional regulator, MarR family (EKX83971.1)   | 603  | MarR family transcriptional regulator [ <i>Pseudomonas putida</i> CBF10-2] (OAI92365.1)   | 77/99        | 5e-106       |
|                                                                          |                                                       |      | MarR family transcriptional regulator [ <i>Pseudomonas</i> sp. URHB0015] (WP_027618844.1) | 75/84        | 1e-88        |

|             |                                                                     |      |                                                                                                                |              |                  |
|-------------|---------------------------------------------------------------------|------|----------------------------------------------------------------------------------------------------------------|--------------|------------------|
|             |                                                                     |      | MarR family transcriptional regulator [ <i>Comamonas testosteroni</i> strain BR60] (AAW33714.1)                | 77/26        | 2e-06            |
| <i>verB</i> | Veratric acid <i>O</i> -demethylase oxidoreductase* (EKX83972.1)    | 954  | Vanillate <i>O</i> -demethylase oxidoreductase [ <i>Pseudomonas putida</i> ] (WP_064303028.1)                  | 100/98       | 0.0              |
|             |                                                                     |      | Vanillate <i>O</i> -demethylase oxidoreductase [ <i>Pseudomonas</i> sp. URHB0015] (WP_027618843.1)             | 100/79       | 0.0              |
|             |                                                                     |      | <b>Ferredoxin-NADP<sup>+</sup> reductase [<i>Comamonas testosteroni</i>] (AAW33717.1)</b>                      | <b>99/49</b> | <b>3.00E-109</b> |
| <i>verA</i> | Veratric acid <i>O</i> -demethylase oxygenase subunit* (EKX83973.1) | 1077 | (2Fe-2S) ferredoxin [ <i>Pseudomonas putida</i> ] (WP_064303029.1)                                             | 100/99       | 0.0              |
|             |                                                                     |      | (2Fe-2S) ferredoxin [ <i>Pseudomonas</i> sp. ES3-33] (WP_045058486.1)                                          | 100/86       | 0.0              |
|             |                                                                     |      | <b>4-<i>O</i>-demethylase oxygenase subunit [<i>Comamonas testosteroni</i>] (AAW33716.1)</b>                   | <b>94/68</b> | <b>0.0</b>       |
| <i>tdh</i>  | Formaldehyde dehydrogenase, glutathione-independent (EKX83974.1)    | 1200 | Formaldehyde dehydrogenase, glutathione-independent [ <i>Pseudomonas putida</i> ] (WP_064303030.1)             | 100/99       | 0.0              |
|             |                                                                     |      | Formaldehyde dehydrogenase, glutathione-independent [ <i>Pseudomonas nitroreducens</i> ] (WP_017521542.1)      | 100/98       | 0.0              |
|             |                                                                     |      | Glutathione-independent formaldehyde dehydrogenase [ <i>Pseudomonas denitrificans</i> ATCC 13867] (AGI26785.1) | 100/98       | 0.0              |
| <i>vanK</i> | MFS transporter (EKX83975.1)                                        | 1335 | MFS transporter [ <i>Pseudomonas putida</i> ] (WP_064303031.1)                                                 | 100/99       | 0.0              |
|             |                                                                     |      | MFS transporter [ <i>Pseudomonas</i> sp. URHB0015] (WP_027618841.1)                                            | 100/83       | 0.0              |

**VanK, MFS transporter [*Acinetobacter* sp. ADP1] (AAC27108.1)** **97/48** **8e-143**

|             |                    |      |                                                           |        |     |
|-------------|--------------------|------|-----------------------------------------------------------|--------|-----|
| <i>oprD</i> | Porin (EKX83976.1) | 1278 | Porin [ <i>Pseudomonas putida</i> ] (WP_064303032.1)      | 100/99 | 0.0 |
|             |                    |      | Porin [ <i>Pseudomonas</i> sp. URHB0015] (WP_051550534.1) | 98/82  | 0.0 |
|             |                    |      | porin [ <i>Pseudomonas putida</i> MC4] (KEX91953.1)       | 97/76  | 0.0 |

**C] Vanillic acid metabolism (*van* locus, contig 220)**

|             |                                                                     |      |                                                                                                         |               |              |
|-------------|---------------------------------------------------------------------|------|---------------------------------------------------------------------------------------------------------|---------------|--------------|
| <i>gntR</i> | GntR family transcriptional regulator (EKX81750.1)                  | 678  | GntR family transcriptional regulator [ <i>Pseudomonas putida</i> ] (WP_037062423.1)                    | 100/99        | 8e-160       |
|             |                                                                     |      | VanR, transcriptional regulator [ <i>Comamonas testosteroni</i> ] (AAW33712.1)                          | 92/42         | 1e-50        |
|             |                                                                     |      | <b>VanR, transcriptional regulator [<i>Acinetobacter</i> sp. ADP1] (AAC27105.1)</b>                     | <b>90/45</b>  | <b>8e-68</b> |
| <i>vanA</i> | Vanillic acid <i>O</i> -demethylase oxygenase subunit* (EKX81751.1) | 1053 | Rieske (2Fe-2S) protein [ <i>Pseudomonas putida</i> ] (WP_064303990.1)                                  | 100/99        | 0.0          |
|             |                                                                     |      | <b>Vanillate <i>O</i>-demethylase alpha subunit [<i>Pseudomonas</i> sp. Strain HR199 ] (O05616.1)</b>   | <b>100/80</b> | <b>0.0</b>   |
|             |                                                                     |      | <b>Vanillate <i>O</i>-demethylase oxygenase subunit [<i>Pseudomonas putida</i> KT2440] (AAN69332.1)</b> | <b>100/76</b> | <b>0.0</b>   |
| <i>vanB</i> | Vanillic acid <i>O</i> -demethylase oxidoreductase* (EKX81752.1)    | 924  | Vanillate <i>O</i> -demethylase oxidoreductase [ <i>Pseudomonas putida</i> ] (WP_064303991.1)           | 100/99        | 0.0          |
|             |                                                                     |      | <b>Vanillate <i>O</i>-demethylase beta subunit [<i>Pseudomonas</i> sp.]</b>                             | 100/62        | 3.00E-       |

---

---

|                                                                                                 |        |           |
|-------------------------------------------------------------------------------------------------|--------|-----------|
| <b>Strain HR199 ] (O05617.7)</b>                                                                |        | 136       |
| <b>Vanillate O-demethylase beta subunit [<i>Pseudomonas fluorescens</i> BF13 ] (CAB93957.1)</b> | 100/59 | 5.00E-128 |

**D] Protocatechuate metabolism (contig 99)**

|             |                                                              |     |                                                                                                         |               |               |
|-------------|--------------------------------------------------------------|-----|---------------------------------------------------------------------------------------------------------|---------------|---------------|
| <i>pcaH</i> | Protocatechuate 3,4-dioxygenase, beta subunit* (EKX84869.1)  | 720 | Protocatechuate 3,4-dioxygenase beta subunit [ <i>Pseudomonas japonica</i> ] (WP_042124863.1)           | 100/98        | 1e-174        |
|             |                                                              |     | <b>Protocatechuate 3,4-dioxygenase beta subunit [<i>Pseudomonas putida</i>] (2PCD_M)</b>                | <b>98/89</b>  | <b>3e-167</b> |
|             |                                                              |     | <b>Protocatechuate 3,4-dioxygenase beta subunit [<i>Pseudomonas</i> sp. Strain HR199] (CAB43484.1)</b>  | <b>100/89</b> | <b>5e-171</b> |
| <i>pcaG</i> | Protocatechuate 3,4-dioxygenase, alpha subunit* (EKX84870.1) | 606 | Protocatechuate 3,4-dioxygenase alpha subunit [ <i>Pseudomonas japonica</i> ] (WP_042124861.1)          | 100/93        | 3e-137        |
|             |                                                              |     | <b>Protocatechuate 3,4-dioxygenase alpha subunit [<i>Pseudomonas putida</i>] (2PCD_A)</b>               | <b>99/88</b>  | <b>1e-137</b> |
|             |                                                              |     | <b>Protocatechuate 3,4-dioxygenase alpha subunit [<i>Pseudomonas</i> sp. Strain HR199] (CAB43485.1)</b> | <b>100/82</b> | <b>2e-131</b> |

---

\* indicates activity demonstrated in strain CSV86

Bold faced indicate functionally characterized protein
